1                    **Breastfeeding outcomes in late preterm infants:**  
2                    **a multi-centre prospective cohort study**

3                    Amy Keir<sup>1,2,3,4\*</sup>, Alice Rumbold<sup>1,2,4</sup>, Carmel T Collins<sup>1,2</sup>, Andrew J McPhee<sup>1</sup>, Jojy Varghese<sup>5</sup>,  
4                    Scott Morris<sup>6</sup>, Thomas R Sullivan<sup>1,7</sup>, Shalem Leemaqz<sup>1</sup>, Philippa Middleton<sup>1</sup>, Maria  
5                    Makrides<sup>1,2</sup>, Karen P Best<sup>1,2</sup>

6                    <sup>1.</sup> SAHMRI Women and Kids, South Australian Health and Medical Research Institute,  
7                    South Australia

8                    <sup>2.</sup> Adelaide Medical School, the University of Adelaide, South Australia

9                    <sup>3.</sup> Department of Neonatal Medicine, Women's and Children's Hospital, North Adelaide,  
10                    South Australia

11                    <sup>4.</sup> Robinson Research Institute, the University of Adelaide, South Australia

12                    <sup>5.</sup> Lyell McEwin Hospital, Elizabeth Vale, South Australia

13                    <sup>6.</sup> Department of Neonatology, Flinders Medical Centre, Bedford Park, South Australia,  
14                    Australia.

15                    <sup>7.</sup> School of Public Health, the University of Adelaide, South Australia

16

17                    \*Corresponding author

18                    Email: karen.best@adelaide.edu.au

## 19 Abstract

20           **Objectives:** To describe (1) infant feeding practices during initial hospitalisation and  
21 up to 6 months corrected age (CA) in infants born late preterm with mothers intending to  
22 breastfeed, (2) the impact of early feeding practices on hospital length of stay and (3)  
23 maternal and infant factors associated with duration of breastfeeding. **Methods:** We  
24 conducted a prospective cohort study of infants born at 34<sup>+0</sup> to 36<sup>+6</sup> weeks gestational age  
25 during 2018-2020. Families were followed up until the infant reached 6 months of age  
26 (corrected for prematurity). Feeding practices during the birth hospitalisation, length of  
27 initial hospital stay, and the prevalence of exclusive or any breastfeeding at 6 weeks, 3  
28 months, and 6 months CA were examined. Associations between maternal and infant  
29 characteristics and breastfeeding at 6 weeks, 3 months and 6 months CA were assessed  
30 using multivariable logistic regression models. **Results:** 270 infants were enrolled, of these,  
31 30% were multiple births. Overall, 78% of infants received only breastmilk as their first feed,  
32 and 83% received formula during the hospitalisation. Seventy-four per cent of infants were  
33 exclusively breastfed at discharge, 41% at 6 weeks CA, 35% at 3 months CA, and 29% at 6  
34 months CA. The corresponding combined exclusive and partial breastfeeding rates (any  
35 breastfeeding) were 72%, 64%, and 53% of babies at 6 weeks CA, 3 months CA, and 6  
36 months CA, respectively. The mean duration of hospitalisation was 2.9 days longer (95%  
37 confidence interval (CI) 0.31, 5.43 days) in infants who received any formula compared with  
38 those receiving only breastmilk (adjusted for GA, maternal age, multiple birth, site, and  
39 neonatal intensive care unit admission). In multivariable models, receipt of formula as the  
40 first milk feed was associated with a reduction in exclusive breastfeeding at 6 weeks CA  
41 (odds ratio = 0.22; 95% CI 0.09 to 0.53) and intention to breastfeed >6 months with an

42 increase (odds ratio = 4.98; 95% CI 2.39 to 10.40). Intention to breastfeed >6 months

43 remained an important predictor of exclusive breastfeeding at 3 and 6 months CA.

44 **Conclusions:** Our study demonstrates that long-term exclusive breastfeeding rates were low

45 in a cohort of women intending to provide breastmilk to their late preterm infants, with

46 approximately half providing any breastmilk at 6 months CA. Formula as the first milk feed

47 and intention to breastfeed >6 months were significant predictors of breastfeeding

48 duration. Improving breastfeeding outcomes may require strategies to support early

49 lactation and a better understanding of the ongoing support needs of this population.

## 50 Introduction

51 Every year around 15 million infants are born preterm.<sup>1</sup> Late preterm infants born  
52 between 34<sup>+0</sup> to 36<sup>+6</sup> weeks gestation make up approximately 7% of the infant population  
53 and about 70-75% of all preterm births.<sup>2, 3</sup> Late preterm infants are often considered  
54 functionally full term because of their size and because they are generally clinically stable.  
55 They are, however, born physiologically and metabolically immature. Consequently, late  
56 preterm infants have higher morbidity rates, prolonged hospitalisation and re-  
57 hospitalisation, and healthcare costs than term infants.<sup>4</sup>

58 Breastmilk is the optimal nutrition to support overall growth and development, gut  
59 maturation and immune protection. Complications relating to poor feeding are major  
60 contributors to the health burden in this population and one of the leading causes of  
61 extended hospital stay and readmission.<sup>5</sup> Yet, there is very little evidence to guide  
62 nutritional management of this group, as research in neonatal nutrition has primarily  
63 focussed on improving outcomes in very preterm infants born less than 32 weeks  
64 gestation.<sup>6</sup> Notably, contemporary evidence about breastfeeding outcomes for infants born  
65 late preterm is lacking. The limited available evidence suggests breastfeeding rates in the  
66 late preterm population are lower than in infants born at term.<sup>7 8</sup> A key limitation of existing  
67 studies is the focus on breastfeeding status at discharge from the hospital rather than  
68 longer-term breastfeeding outcomes.<sup>9</sup> Further, in term infants, early exposure to formula  
69 may interfere with successful long-term breastfeeding<sup>10</sup> but this has not been fully explored  
70 in late preterm infants. Understanding the progression of breastfeeding in this population  
71 beyond discharge, the influence of early feeding practices on hospital stay, and the key

72 factors associated with breastfeeding duration will help identify the areas where targeted  
73 support may help mothers sustain breastfeeding.

74 Our study aimed to describe feeding practices in infants born late preterm, the  
75 maternal and infant factors associated with longer duration of breastfeeding and the impact  
76 of early formula feeding on hospital length of stay.

77

## 78 **Methods**

79 **Study design:** Prospective cohort study of feeding patterns to 6 months corrected  
80 age of infants born at 34<sup>+0</sup> to 36<sup>+6</sup> weeks gestation (late-preterm).

81 **Setting:** Research personnel identified late-preterm infants during their birth  
82 admission in the neonatal unit or postnatal ward of the Women's and Children's Hospital  
83 (WCH), Flinders Medical Centre (FMC) and Lyell McEwin Hospital (LMH). All centres are in  
84 metropolitan South Australia and represent the three major perinatal centres in the state.  
85 Women were recruited between 8<sup>th</sup> August 2018 and 18<sup>th</sup> September 2019 and data  
86 collection was finalised on 24<sup>th</sup> April 2020.

87 **Participants:** Mothers of infants born 34<sup>+0</sup> to 36<sup>+6</sup> weeks gestation, intending to  
88 breastfeed and residing in South Australia, were eligible for inclusion up to 42 weeks post-  
89 menstrual age (PMA). Infants with a lethal congenital anomaly and/or not expected to  
90 survive to discharge home were excluded, as were women choosing to formula feeding their  
91 babies exclusively at the time of screening. Women provided written or electronic informed  
92 consent to participate.

93 **Data collection:** At enrolment, data were collected on infants (gestational age,  
94 plurality, sex, weight, length and head circumference at birth, short-term clinical outcomes),

95 mothers (age, born in Australia or overseas, whether they identify as Aboriginal or Torres  
96 Strait Islander, postcode, type of delivery), and maternal feeding intent before to delivery  
97 and at enrolment (breastfeeding, formula, mixed feeding, or undecided). Data were  
98 collected from infant medical records on date and type of first enteral feed (maternal  
99 breastmilk, donor breast milk or formula), type of enteral feeds at discharge, type and  
100 method of feeding on discharge home, and mother and infant hospital length of stay.  
101 Maternal surveys were designed using a Research Electronic Data Capture (REDCap)  
102 database (<https://www.project-redcap.org/>)<sup>11, 12</sup> and sent to participants by text message to  
103 their mobile phone or by email. Surveys were sent weekly until infants reached 42 weeks  
104 corrected age (CA) and then at 6 weeks CA, 3 months CA, and 6 months CA.  
105 Data were collected about breastfeeding practices at each time point and included current  
106 breastfeeding status and feeding method. All data were collected and managed using the  
107 REDCap database hosted on secure servers by the South Australian Health and Medical  
108 Research Institute.

109 **Outcomes:** Key outcomes were exclusive breastfeeding at 6 weeks, 3 months, and 6  
110 months of age, corrected for prematurity, and any breastfeeding (exclusive or mixed  
111 feeding) at these time points. Any breastfeeding was defined as a baby receiving any breast  
112 milk at each time point and in the preceding week. Exclusive breastfeeding was defined as a  
113 baby receiving only breastmilk (with the exception of medications, oral rehydration  
114 solutions or vitamins and minerals) and no infant formula or non-human milk at each study  
115 time point and the week immediately prior. The impact of feeding practices on initial  
116 hospital length of stay was assessed.

117 **Sample size:** A sample size of 230 women allowed for the percentage of  
118 breastfeeding (exclusive or any) to be estimated with a precision of  $\pm 7\%$  or better, with

119 precision defined as a 95% confidence interval (CI) width around the estimated percentage.  
120 The sample size allowed for a 10% loss to follow-up and conservatively assumes no gains in  
121 precision due to the inclusion of multiple births.

122 **Ethical Considerations:** Breastfeeding mothers of late preterm infants were  
123 approached in the Neonatal Unit or Postnatal ward and informed consent was obtained for  
124 their infant/s. Ethics approval was granted by the Women's and Children's Health Network  
125 Human Research Ethics Committee HREC/18/WCHN/064. Site-specific and local governance  
126 approvals were obtained at each study site.

127 **Statistical methods:** Descriptive statistics are given as means with standard  
128 deviations (SD) or frequencies (percentages) according to the type and distribution of the  
129 data. Differences in infant hospital length of stay according to early use of formula was  
130 analysed using linear regression, with generalised estimating equations used to account for  
131 clustering due to multiple births. An adjustment was made for gestational age, maternal  
132 age, multiple birth, site and neonatal intensive care unit admission, all considered potential  
133 confounders of the association, with results described as a mean difference with a 95% CI.  
134 Associations between maternal and infant characteristics and breastfeeding at 6 weeks, 3  
135 months and 6 months CA were assessed using multivariable logistic regression models  
136 (separate models for exclusive breastfeeding and any breastfeeding at each time point),  
137 with generalised estimating equations used to account for clustering due to multiple births.  
138 Effects are described as odds ratios (OR) with 95% CI. Maternal and infant characteristics  
139 were included in multivariable models based on factors associated with increased  
140 breastfeeding rates reported in the literature.<sup>13</sup> There was no evidence of collinearity  
141 between characteristics or poor model fit in any of the multivariable models considered.  
142 Due to low loss to follow-up rates, complete case analyses were used to address missing

143 data. Statistical calculations were performed using R version 4.0.2 (R Foundation for  
144 Statistical Computing, Vienna, Austria).



## 145 Results

146 Two hundred seventy infants born at 34<sup>+0</sup> to 36<sup>+6</sup> weeks gestational age born to 229  
 147 mothers were recruited and included in the final analysis (Figure 1).

### 148 Figure 1. Participant flow chart - infants

149 The mean age of mothers was 31.3 years and most women were born in Australia (76%). A  
 150 high proportion of women planned to breastfeed their baby prior to delivering (84%) and  
 151 64% planned to continue breastfeeding for at least 6 months. Slightly more males were  
 152 enrolled (58%) and the mean infant birthweight was 2.5Kg. See **Table 1** for complete  
 153 description of the characteristics of mothers and their infants included in the study.

154 **Table 1: Maternal and infant characteristics\***

| Maternal Characteristics                               | N=229    |
|--------------------------------------------------------|----------|
| Maternal age (years): Mean (SD), (n=223)               | 31 (5)   |
| Mother born in Australia, (n=220)                      | 167 (76) |
| Mother Aboriginal or Torres Strait Islander, (n=216)   | 9 (4)    |
| SEIFA# A+D quintile, (n=187)                           |          |
| - 1                                                    | 47 (25)  |
| - 2                                                    | 26 (14)  |
| - 3                                                    | 57 (31)  |
| - 4                                                    | 39 (21)  |
| - 5                                                    | 18 (10)  |
| Multiple birth, (n = 229)                              | 41 (18)  |
| Mode of birth, (n=224)                                 |          |
| - Vaginal delivery                                     | 122 (55) |
| - Emergency caesarean                                  | 71 (32)  |
| - Elective caesarean                                   | 31 (14)  |
| Length of inpatient stay (days): Median (IQR), (n=223) | 3 (2-5)  |
| Planned duration of breastfeeding, (n=207)             |          |
| - ≤6 months                                            | 31 (15)  |
| - >6 months                                            | 133 (64) |
| - Undecided                                            | 43 (21)  |
| Planned mode of feeding prior to birth, (n=221)        |          |
| - Breastfeeding (by breast or bottle)                  | 186 (84) |

|                                                                   |              |
|-------------------------------------------------------------------|--------------|
| - Formula Feeding (or mixed feeding)                              | 30 (14)      |
| - Undecided                                                       | 5 (2)        |
| <b>Infant Characteristics</b>                                     | <b>N=270</b> |
| Sex, (n=270)                                                      |              |
| Birthweight (kg): mean (SD), (n=262)                              | 2.5 (0.5)    |
| Gestational age <36 weeks, (n=270)                                | 150 (56)     |
| Jaundice (requiring phototherapy), (n=263)                        | 116 (44)     |
| Hypoglycaemia <sup>‡</sup> , (n=262)                              | 85 (32)      |
| Hypothermia within the first 24 hours of age, (n=262)             | 184 (70)     |
| Neonatal intensive care unit admission, (n=262)                   | 39 (15)      |
| Length of inpatient stay (days): Mean (SD), (n=264)               | 10.9 (9.4)   |
| Readmission within the first 7 days of initial discharge, (n=263) | 26 (10)      |

155 \* Results are expressed as No. (%) unless otherwise indicated.

156 #Socio-Economic Indexes for Areas (SEIFA) 1 being the most disadvantaged and 5 the most advantaged.

157 Further information: <https://www.abs.gov.au/websitedbs/censushome.nsf/home/seifa>

158 <sup>‡</sup>Hypoglycaemia <2.0mmol/L <4 hours of age or <2.5mmol/L >4 hours of age - until 24 hours of age.

159 **Feeding practices**

160 During their initial hospital stay, 97% (n=261) of infants received breastmilk; 17% (n=45)  
 161 received breastmilk only, and 83% (n=225) received infant formula during their hospital  
 162 stay; no infants received donor breast milk, **Table 2**. The mean length of stay for infants  
 163 (n=264) was 10.9 days (SD 9.4), (Table 1) compared to 8.2 days (SD 7.2) for those receiving  
 164 breastmilk only (n=45) and 11.4 (SD 9.7) days for infants that received any formula (n=216).  
 165 Adjusting for maternal age, multiple birth, study site and neonatal intensive care admission,  
 166 the mean difference between the breastmilk only and any formula groups was 5.5 days  
 167 (95% CI 2.86 to 8.20). The difference was attenuated with further adjustment for gestational  
 168 age but remained significantly different at 2.9 days (95% CI 0.31 to 5.43, p=0.03).

169 **Table 2: Infant feeding practices during initial hospitalisation**

| Type of feeding and method                                    | N=270<br>N (%) |
|---------------------------------------------------------------|----------------|
| Type of first milk feed                                       |                |
| - Breastmilk, any                                             | 203 (77.8)     |
| - Formula                                                     | 58 (22.2)      |
| Types of milk feeds given during the baby's admission         |                |
| - Breastmilk (mother's own)                                   | 261 (96.7)     |
| - Formula (preterm formulation)                               | 103 (38.1)     |
| - Formula (term formulation)                                  | 168 (62.2)     |
| - Other (e.g., breastmilk with additives)                     | 72 (26.7)      |
| Types of feeding methods used during the baby's admission     |                |
| - Breastfeeding (direct)                                      | 251 (93.0)     |
| - Bottle                                                      | 206 (76.3)     |
| - Gavage feeding                                              | 168 (62.2)     |
| - Syringe, Finger-feeding                                     | 175 (64.8)     |
| - Cup feeding                                                 | 5 (1.9)        |
| - Supply line                                                 | 6 (2.2)        |
| - Other (e.g., perfusor feeding)                              | 54 (20.0)      |
| Received intravenous fluid for nutrition or hydration (n=261) | 113 (43.3)     |
| Types of feeds on discharge home                              |                |
| - Breastmilk only (mothers own)                               | 200 (74.1)     |
| - Breastmilk and formula (mixed feeding)                      | 58 (21.5)      |
| - Formula                                                     | 41 (15.2)      |

|                                            |            |
|--------------------------------------------|------------|
| - Other (e.g. breastmilk with additives)   | 35 (13.0)  |
| <hr/>                                      |            |
| Types of feeding methods on discharge home |            |
| - Breastfeeding (direct)                   | 239 (88.5) |
| - Bottle                                   | 175 (64.8) |
| - Gavage feeding                           | 54 (20.0)  |
| - Syringe, Finger-feeding                  | 21 (7.8)   |
| - Supply line                              | 1 (0.4)    |
| - Other                                    | 14 (5.2)   |
| <hr/>                                      |            |

170

171 On initial discharge home, 74% (n=200) of the infants were exclusively breastfeeding  
 172 (Table 2). At 6 weeks CA, 72% (n=183) of infants were still receiving some breastmilk. By 3  
 173 months CA, this was 64% (n=162), and by 6 months CA, this had fallen further to 53%  
 174 (n=132) infants receiving any breastmilk. Exclusive breastfeeding at 6 weeks CA was 41%  
 175 (n=103), and at 3 months CA was at 35% (n=88), **Table 3**.

176 **Table 3: Breast feeding outcomes at 6 weeks, 3 months and 6 months corrected age**

| Timepoint                           | N=270<br>N (%) [95% CI] |
|-------------------------------------|-------------------------|
| Breastfeeding at 6 weeks, (n=251):  |                         |
| - Exclusive                         | 103 (41.0) [34.1, 47.9] |
| - Mixed                             | 80 (31.9) [25.2, 38.6]  |
| - None                              | 68 (27.1) [20.7, 33.4]  |
| Breastfeeding at 3 months, (n=253): |                         |
| - Exclusive                         | 88 (34.8) [28.3, 41.3]  |
| - Mixed                             | 74 (29.2) [22.9, 35.6]  |
| - None                              | 91 (36.0) [29.3, 42.7]  |
| Breastfeeding at 6 months, (n=248): |                         |
| - Exclusive                         | 71 (28.6) [22.4, 34.9]  |
| - Mixed                             | 61 (24.6) [18.6, 30.6]  |
| - None                              | 116 (46.8) [39.7, 53.9] |

177

178 **Maternal and infant factors associated with longer duration of breastfeeding**

179 Gestational age was not associated with increased exclusive or partial breastfeeding  
180 duration at 6 weeks, 3 months, or 6 months CA, **Table 4**. Maternal intention to breastfeed  
181 longer than 6 months was associated with an increased likelihood of receiving exclusive  
182 breastmilk at all time points. Receipt of any formula as the first milk feed was associated  
183 with a decreased likelihood of exclusive or any breastfeeding at 6 weeks, adjusted OR 0.22  
184 (0.09, 0.53), OR 0.36 (0.14, 0.93), respectively. Care at one study centre was associated with  
185 an increased likelihood of any breastfeeding at 6 weeks CA (OR 9.25, 95 % CI 1.77 to 48.26);  
186 no other centre associations were found at the other time points, Table 4.

187 Table 4: Multivariable models to determine factors associated with exclusive breastfeeding and any breastfeeding

| Variable                   | 6 weeks                                               |                                              | 3 months                                              |                                              | 6 months                                              |                                              |
|----------------------------|-------------------------------------------------------|----------------------------------------------|-------------------------------------------------------|----------------------------------------------|-------------------------------------------------------|----------------------------------------------|
|                            | Adjusted OR<br>exclusive<br>breastfeeding<br>(95% CI) | Adjusted OR<br>any breastfeeding<br>(95% CI) | Adjusted OR<br>exclusive<br>breastfeeding<br>(95% CI) | Adjusted OR<br>any breastfeeding<br>(95% CI) | Adjusted OR<br>exclusive<br>breastfeeding<br>(95% CI) | Adjusted OR<br>any breastfeeding<br>(95% CI) |
| *Centre = WCH              | 1 (reference)                                         | 1 (reference)                                | 1 (reference)                                         | 1 (reference)                                | 1 (reference)                                         | 1 (reference)                                |
| Centre=FMC                 | 1.04 (0.33, 3.34)                                     | <b>9.25 (1.77, 48.26)</b>                    | 0.92 (0.29, 2.98)                                     | 2.26 (0.75, 6.83)                            | 1.20 (0.36, 4.01)                                     | 2.21 (0.55, 8.89)                            |
| Centre=LMH                 | 1.24 (0.39, 3.90)                                     | 0.48 (0.14, 1.64)                            | 1.49 (0.55, 4.09)                                     | 0.54 (0.17, 1.74)                            | 0.85 (0.26, 2.83)                                     | 0.66 (0.21, 2.08)                            |
| †Plan to breastfeed >6mths | <b>4.98 (2.39, 10.40)</b>                             | <b>10.79 (4.37, 26.63)</b>                   | <b>4.67 (2.20, 9.92)</b>                              | <b>9.21 (4.26, 19.92)</b>                    | <b>6.64 (2.67, 16.47)</b>                             | <b>6.92 (3.26, 14.66)</b>                    |
| Child sex=male             | 0.72 (0.36, 1.42)                                     | <b>0.31 (0.12, 0.79)</b>                     | 0.78 (0.40, 1.54)                                     | 0.65 (0.30, 1.44)                            | 0.65 (0.31, 1.35)                                     | 0.69 (0.34, 1.40)                            |
| NICU=yes                   | 0.89 (0.40, 2.00)                                     | 1.32 (0.41, 4.26)                            | 0.84 (0.36, 1.95)                                     | 0.83 (0.32, 2.12)                            | 0.89 (0.35, 2.23)                                     | 0.84 (0.40, 1.77)                            |
| Formula as first milk feed | <b>0.22 (0.09, 0.53)</b>                              | <b>0.36 (0.14, 0.93)</b>                     | 0.51 (0.22, 1.17)                                     | 0.51 (0.20, 1.30)                            | 0.43 (0.16, 1.15)                                     | 0.67 (0.26, 1.74)                            |
| #SEIFA 1                   | 1 (reference)                                         | 1 (reference)                                | 1 (reference)                                         | 1 (reference)                                | 1 (reference)                                         | 1 (reference)                                |
| SEIFA 2                    | 0.98 (0.34, 2.83)                                     | 1.00 (0.28, 3.61)                            | 1.03 (0.37, 2.91)                                     | 2.03 (0.59, 7.03)                            | 0.80 (0.29, 2.26)                                     | 1.33 (0.42, 4.25)                            |
| SEIFA 3                    | 1.47 (0.62, 3.53)                                     | 2.42 (0.79, 7.46)                            | 1.53 (0.62, 3.77)                                     | 2.34 (0.86, 6.35)                            | 0.93 (0.37, 2.34)                                     | 1.64 (0.69, 3.89)                            |
| SEIFA 4                    | 1.64 (0.58, 4.61)                                     | 1.80 (0.48, 6.80)                            | 1.88 (0.69, 5.11)                                     | 2.09 (0.67, 6.54)                            | 1.05 (0.35, 3.18)                                     | 1.44 (0.51, 4.09)                            |
| SEIFA 5                    | 1.04 (0.25, 4.33)                                     | 5.13 (0.92, 28.67)                           | 2.02 (0.50, 8.12)                                     | <b>11.19 (2.40, 52.05)</b>                   | 0.99 (0.23, 4.26)                                     | 4.33 (0.73, 25.52)                           |

188 **Results reaching statistical significance are in bold**

189 **Abbreviations:** CI, Confidence interval; OR, odds ratio; WCH, Women's and Children's Hospital; FMC, Flinders Medical Centre; LMH, Lyell McEwin Hospital; NICU, neonatal  
190 intensive care unit; SEIFA, Socio-Economic Indexes for Areas

191 \*Global p-value for Centre: (6 weeks) OR exclusive P=0.93 and OR mixed or exclusive P=0.009; (3 months) OR exclusive P=0.71 and OR mixed or exclusive P=0.14; (6  
192 months) OR exclusive P=0.91 and OR mixed or exclusive P=0.13

193 †'Undecided' and ≤6 months combined as reference group due to small numbers

194 #Socio-Economic Indexes for Areas (SEIFA) 1 being the most disadvantaged and 5 the most advantaged' Global p-value for SEIFA: (6 weeks) OR exclusive P=0.81 and OR  
195 mixed or exclusive P=0.27; (3 months) OR exclusive P=0.64 and OR mixed or exclusive P=0.04; (6 months) OR exclusive P=0.99 and OR mixed or exclusive P=0.51



## 196                    **Discussion**

197                    In this prospective cohort of South Australian women intending to provide  
198 breastmilk to their late preterm infants, exclusive breastfeeding rates at discharge were  
199 lower than rates reported in term infant populations in Australia.<sup>14</sup> Approximately half of  
200 participating women were providing at least some breastmilk at 6 months CA. Further,  
201 Formula use as the first milk feed in the hospital and intention to breastfeed >6 months  
202 were significant predictors of breastfeeding duration. Further, The use of formula during  
203 hospitalisation was associated with a longer length of stay than when only maternal  
204 breastmilk was fed to infants after correcting for potential confounders.

205                    Breastmilk is the optimal nutrition for infants and critical for late preterm infants to  
206 support overall growth and development, gut maturation and immune protection.<sup>15, 16</sup> In  
207 our cohort study of women who intended to provide at least some breastmilk to their  
208 babies, 80% of their babies received any formula as supplementary nutrition. This is  
209 consistent with the limited existing literature reporting early nutrition practices in late  
210 preterm infants, which suggests that formula use is common during the neonatal  
211 admission.<sup>17</sup>

212                    Our findings may reflect the frequent delays in establishing breastfeeding in this  
213 population, potentially resulting in the use of formula to avoid hypoglycaemia, dehydration  
214 and to support the high nutrient requirements for postnatal growth. Interestingly, formula  
215 use compared to the use of maternal breastmilk only was associated with a longer length of  
216 hospital stay. This association remained after accounting for factors indicative of the  
217 complexity of care the infants required (e.g., gestational age, neonatal intensive care  
218 admission, and multiple births). Further exploration of this association is warranted, as it

219 may reflect factors not accounted for in our models, such as maternal illness. Nevertheless,  
220 formula use during the neonatal admission may be modifiable with interventions such as  
221 pasteurised donor human milk or oral dextrose preparations.<sup>18</sup> There remains little high-  
222 quality evidence to guide the clinical management of nutrition support in late preterm  
223 infants. Further research is warranted to understand the impact of adopting alternative  
224 strategies to maximise nutritional outcomes in this population.

225 Previous studies have reported that approximately 60% of late preterm infants leave  
226 the hospital being breastfed exclusively, and the overall duration of breastfeeding is shorter  
227 when compared with infants born at term.<sup>19-21</sup> Our study found higher rates of exclusive  
228 breastfeeding at discharge (74%), however, this dropped substantially to 35% by 3 months  
229 CA. Maternal intention to breastfeed for >6 months was the most consistent factor  
230 associated with a longer duration of breastfeeding across all time periods. This is consistent  
231 with previous research,<sup>22</sup> predominantly in term infants, and points to the need to promote  
232 breastfeeding antenatally to help women clarify their intentions. Our findings suggest there  
233 is room to improve support for women after they leave the hospital. Previous research has  
234 identified a lack of support from health care professionals in hospital and after discharge  
235 home and perceptions about low breastmilk supply as key barriers to breastfeeding late  
236 preterm infants.<sup>23</sup> These barriers require addressing and are identified as a priority by  
237 parents and care providers.<sup>24 25</sup>

238 Strengths of our study include recruitment from multiple hospital sites with diverse  
239 populations, prospective collection of data minimising recall bias and minimal attrition to 6  
240 months CA. Our study was designed to examine factors associated with breastfeeding  
241 duration in women who intended to provide at least some breastmilk to their infant, so  
242 there may be limitations with the generalisability of our findings to the whole late preterm

243 infant population. Feeding outcomes post infant discharge were collected by maternal  
244 report, as were other post-discharge outcomes; thus, the findings could be subject to  
245 reporting bias. Further, residual confounding remains a risk in the analyses examining the  
246 length of stay and factors associated with breastfeeding duration, as not all relevant  
247 covariates could be included in the model.

248         Our findings demonstrate that exclusive breastfeeding rates were low in a cohort of  
249 women intending to breastfeed their late preterm infants, with less than half providing  
250 breastmilk at 6 months corrected age. early feeding practices including the use of formula as  
251 the first feed in hospital, and intention to breastfeed >6 months were significant predictors  
252 of breastfeeding duration in this population. These findings highlight the difficulties women  
253 experiencing late preterm birth face in establishing and sustaining breastfeeding and the  
254 need for improved support during initial hospitalisation and in the first few months  
255 following birth.

## 256 **References**

- 257 1. Blencowe H, Cousens S, Chou D, et al. Born Too Soon: The global epidemiology of 15  
258 million preterm births. *Reproductive Health* 2013; 10: S2. DOI: 10.1186/1742-4755-10-S1-S2.
- 259 2. Cheong JL and Doyle LW. Increasing rates of prematurity and epidemiology of late  
260 preterm birth. *J Paediatr Child Health* 2012; 48: 784-788. DOI: 10.1111/j.1440-  
261 1754.2012.02536.x.
- 262 3. Scheil W, Scott J, Catcheside B, et al. *Pregnancy Outcome in South Australia 2011*.  
263 Adelaide: Pregnancy Outcome Unit, SA Health, Government of South Australia: 2013.
- 264 4. Berard A, Le Tiec M and De Vera MA. Study of the costs and morbidities of late-  
265 preterm birth. *Arch Dis Child Fetal Neonatal Ed* 2012; 97: F329-334. DOI:  
266 10.1136/fetalneonatal-2011-300969.
- 267 5. Celik IH, Demirel G, Canpolat FE, et al. A common problem for neonatal intensive  
268 care units: late preterm infants, a prospective study with term controls in a large perinatal  
269 center. *J Matern Fetal Neonatal Med* 2013; 26: 459-462. DOI:  
270 10.3109/14767058.2012.735994.
- 271 6. Gouyon JB, Iacobelli S, Ferdynus C, et al. Neonatal problems of late and moderate  
272 preterm infants. *Semin Fetal Neonatal Med* 2012; 17: 146-152. DOI:  
273 10.1016/j.siny.2012.01.015.
- 274 7. Bonnet C, Blondel B, Piedvache A, et al. Low breastfeeding continuation to 6 months  
275 for very preterm infants: A European multiregional cohort study. *Matern Child Nutr* 2019;  
276 15: e12657. DOI: 10.1111/mcn.12657.

- 277 8. Demirci JR, Sereika SM and Bogen D. Prevalence and predictors of early  
278 breastfeeding among late preterm mother-infant dyads. *Breastfeed Med* 2013; 8: 277-285.  
279 DOI: 10.1089/bfm.2012.0075.
- 280 9. Ayton J, Hansen E, Quinn S, et al. Factors associated with initiation and exclusive  
281 breastfeeding at hospital discharge: late preterm compared to 37 week gestation mother  
282 and infant cohort. *Int Breastfeed J* 2012; 7: 16. DOI: 10.1186/1746-4358-7-16.
- 283 10. Kramer MS, Chalmers B, Hodnett ED, et al. Promotion of Breastfeeding Intervention  
284 Trial (PROBIT) A Randomized Trial in the Republic of Belarus. *JAMA* 2001; 285: 413-420. DOI:  
285 10.1001/jama.285.4.413.
- 286 11. Harris PA, Taylor R, Thielke R, et al. Research electronic data capture (REDCap)—A  
287 metadata-driven methodology and workflow process for providing translational research  
288 informatics support. *Journal of Biomedical Informatics* 2009; 42: 377-381. DOI:  
289 <https://doi.org/10.1016/j.jbi.2008.08.010>.
- 290 12. Harris PA, Taylor R, Minor BL, et al. The REDCap consortium: Building an  
291 international community of software platform partners. *Journal of Biomedical Informatics*  
292 2019; 95: 103208. DOI: <https://doi.org/10.1016/j.jbi.2019.103208>.
- 293 13. Cohen SS, Alexander DD, Krebs NF, et al. Factors Associated with Breastfeeding  
294 Initiation and Continuation: A Meta-Analysis. *The Journal of Pediatrics* 2018; 203: 190-  
295 196.e121. DOI: <https://doi.org/10.1016/j.jpeds.2018.08.008>.
- 296 14. Bentley JP, Nassar N, Porter M, et al. Formula supplementation in hospital and  
297 subsequent feeding at discharge among women who intended to exclusively breastfeed: An  
298 administrative data retrospective cohort study. *Birth* 2017; 44: 352-362. 2017/07/25. DOI:  
299 10.1111/birt.12300.

- 300 15. Alexander T and Bloomfield FH. Nutritional management of moderate-late preterm  
301 infants: Survey of current practice. *Journal of Paediatrics and Child Health* 2019; 55: 338-  
302 342. 2018/08/29. DOI: 10.1111/jpc.14201.
- 303 16. Lapillonne A, Bronsky J, Campoy C, et al. Feeding the Late and Moderately Preterm  
304 Infant: A Position Paper of the European Society for Paediatric Gastroenterology,  
305 Hepatology and Nutrition Committee on Nutrition. *Journal of Pediatric Gastroenterology*  
306 *and Nutrition* 2019; 69: 259-270. DOI: 10.1097/mpg.0000000000002397.
- 307 17. Alexander T and Bloomfield FH. Nutritional management of moderate-late preterm  
308 infants: Survey of current practice. *Journal of Paediatrics and Child Health* 2019; 55: 338-  
309 342. DOI: <https://doi.org/10.1111/jpc.14201>.
- 310 18. Hegarty JE, Harding JE, Crowther CA, et al. Oral dextrose gel to prevent  
311 hypoglycaemia in at-risk neonates. *Cochrane Database of Systematic Reviews* 2017. DOI:  
312 10.1002/14651858.CD012152.pub2.
- 313 19. Boyle EM, Johnson S, Manktelow B, et al. Neonatal outcomes and delivery of care for  
314 infants born late preterm or moderately preterm: a prospective population-based study.  
315 *Archives of Disease in Childhood - Fetal and Neonatal edition* 2015; 100: F479-F485. DOI:  
316 10.1136/archdischild-2014-307347.
- 317 20. Ayton J, Hansen E, Quinn S, et al. Factors associated with initiation and exclusive  
318 breastfeeding at hospital discharge: late preterm compared to 37 week gestation mother  
319 and infant cohort. *International Breastfeeding Journal*: 2012 Dec;7(1):1-621. Australian  
320 Institute of Health and Welfare. *Australia's children. Cat. no. CWS 69*. Canberra: AIHW:  
321 2020.

- 322 22. Prenatal and Postnatal Experiences Predict Breastfeeding Patterns in the WIC Infant  
323 and Toddler Feeding Practices Study-2. *Breastfeeding Medicine*. DOI:  
324 10.1089/bfm.2021.0054.
- 325 23. Gianni ML, Bezze E, Sannino P, et al. Facilitators and barriers of breastfeeding late  
326 preterm infants according to mothers' experiences. *BMC Pediatr* 2016; 16: 179. DOI:  
327 10.1186/s12887-016-0722-7.
- 328 24. Matthews E, Collins CT, Ellison V, et al. Top 10 research priorities for human milk  
329 banking and use of donor human milk: A partnership between parents and clinicians. *J*  
330 *Paediatr Child Health* 2019. DOI: 10.1111/jpc.14742.
- 331 25. Duley L, Uhm S and Oliver S. Top 15 UK research priorities for preterm birth. *The*  
332 *Lancet*; 383: 2041-2042. DOI: 10.1016/S0140-6736(14)60989-2.
- 333
